# Supplementary material
Source: PubMed Central journal article supplement (PMC3714934)
Supplement: mmc1.pdf [file mmc1.pdf]

Supplementary Material for

Understanding the Molecular Basis for the  
Inhibition of the Alzheimer's A $\beta$ -Peptide  
Oligomerization by Transferrin using Saturation  
Transfer Difference and Off-Resonance  
Relaxation NMR Spectroscopy

*Annie V. Raditsis<sup>1</sup>, Julijana Milojevic<sup>1</sup> and Giuseppe Melacini<sup>1,2,\*</sup>*

<sup>1</sup>Department of Chemistry and Chemical Biology and <sup>2</sup>Department of Biochemistry and Biomedical Sciences, McMaster University, 1280 Main Street West, Hamilton, Ontario, L8S 4M1, Canada.

\*Correspondence to: [melacin@mcmaster.ca](mailto:melacin@mcmaster.ca)

## Supplementary Figure Captions

**Figure S1:** *Tf does not significantly bind monomeric A $\beta$ (12-28) under our experimental conditions.* 1D WG-NMR spectra of filtered 125  $\mu$ M A $\beta$  (12-28) before (A) and after (B) the addition of 65  $\mu$ M Tf. A spin-lock is included in the pulse sequence prior to acquisition in order to suppress most of the Tf signal. The asterisks label the peaks of Tf that were not suppressed by the spin-lock. No significant differences are observed between the chemical shifts, intensities or line-widths of the spectra in panels A and B, indicating that under our experimental conditions Tf does not significantly bind monomeric A $\beta$  (12-28). These data were acquired at 293 K and at 700-MHz using a Bruker TCI-Z cryoprobe. The horizontal axis reports the  $^1$ H chemical shift in ppm.

**Figure S2:** *Tf binds oligomeric A $\beta$ (12-28) under our experimental conditions.* 1D WG-NMR spectra of filtered 650  $\mu$ M A $\beta$  (12-28) before (A) and after (B) addition of 60 mM NaCl, which promotes A $\beta$  (12-28) self-association through electrostatic screening. (C) As panel (B) but after the addition of 10  $\mu$ M Tf. The lower intensity of signals in panel (C) relative to those in panel (A) points to Tf binding A $\beta$  (12-28) oligomers. These spectra were acquired at 293 K and at 700 MHz using a Bruker TCI cryoprobe. The horizontal axis reports the  $^1$ H chemical shift in ppm.

**Figure S3:** *Full size expansion of the spectra show in Fig. 1a-c.* The horizontal axis reports the  $^1$ H chemical shift in ppm.

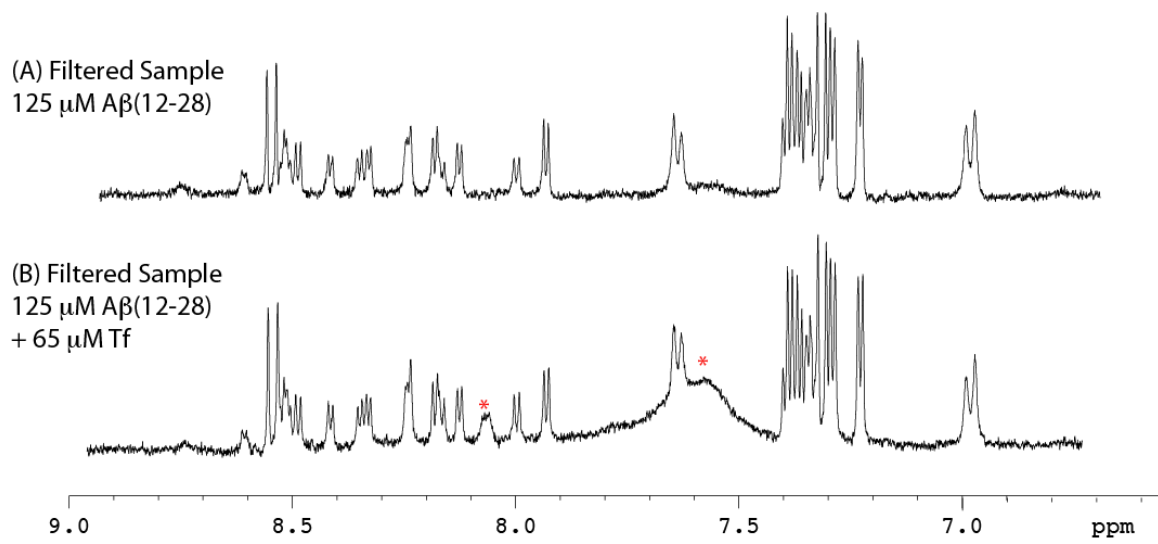

**Figure S1**

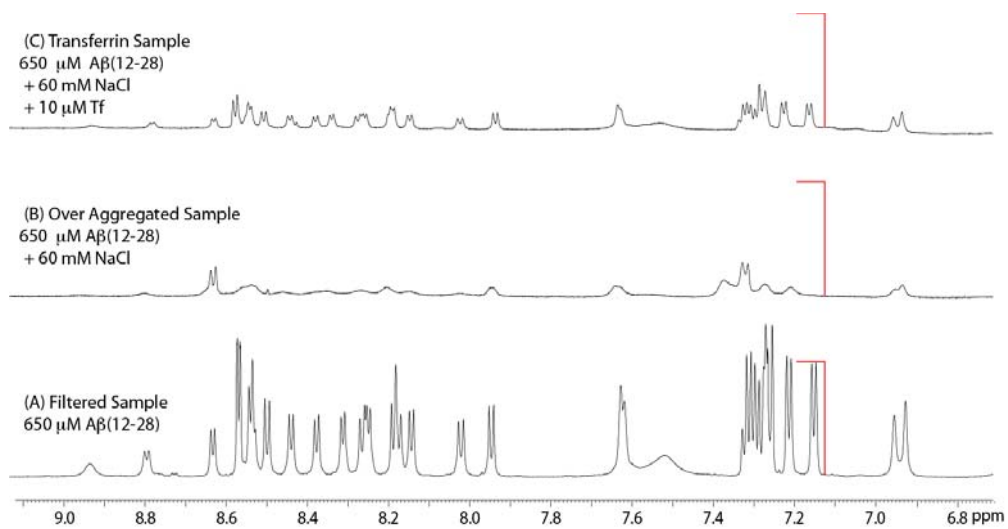

**Figure S2**

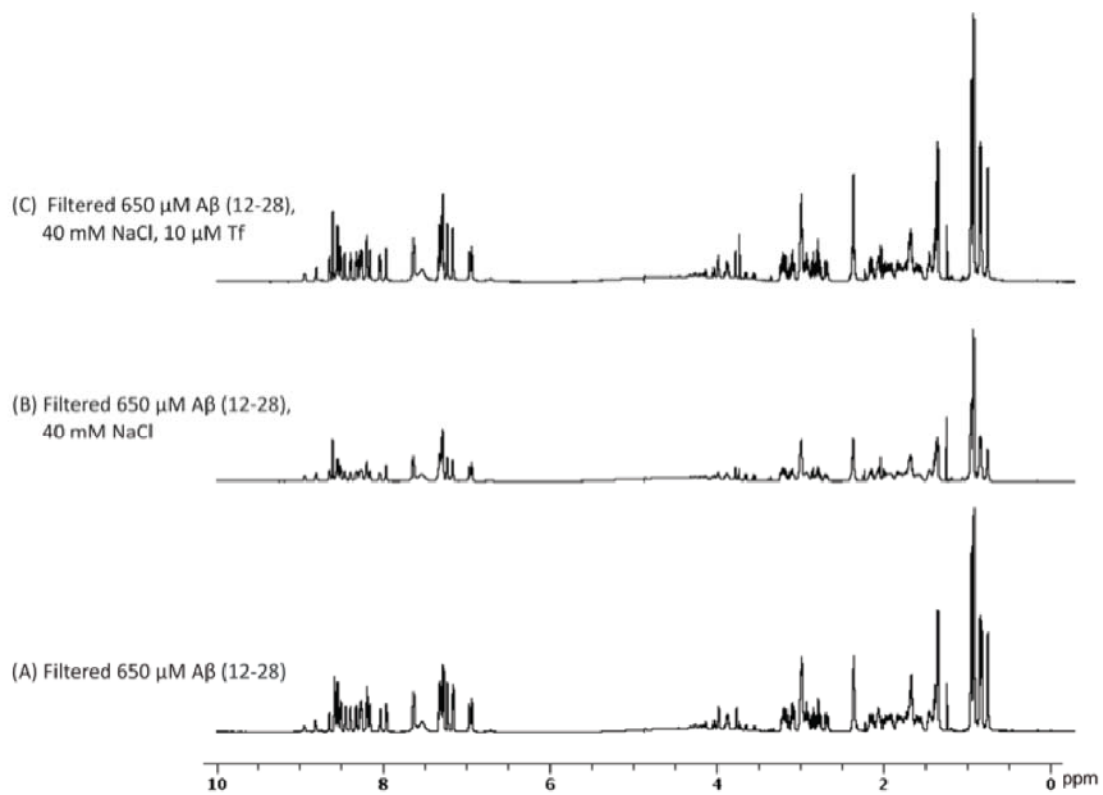

**Figure S3**
