# Supplementary material
Source: PubMed Central journal article supplement (PMC3714934)
Supplement: mmc2.pdf [file mmc2.pdf]

## A $\beta$ Association Inhibition by Transferrin

Annie V. Raditsis,<sup>†</sup> Julijana Milojevic,<sup>†</sup> and Giuseppe Melacini<sup>†\*</sup>

<sup>†</sup>Department of Chemistry and Chemical Biology and <sup>\*</sup>Department of Biochemistry and Biomedical Sciences, McMaster University, Hamilton, Ontario, L8S 4M1, Canada

**ABSTRACT** The iron-transport glycoprotein transferrin has recently been shown to serve as a potent inhibitor of A $\beta$  self-association. Although this novel, to our knowledge, inhibitory function of transferrin is of potential therapeutic interest for the treatment of Alzheimer's disease, the underlying mechanism is still not fully understood. Although it has been shown that the Fe(III) sequestration by transferrin reduces oxidative damage and A $\beta$  aggregation, it is not clear whether transferrin is also able to inhibit A $\beta$  self-association through direct binding of A $\beta$ . Here, using saturation transfer and off-resonance relaxation NMR spectroscopy, we show that transferrin inhibits A $\beta$  aggregation also by preferentially binding A $\beta$  oligomers and outcompeting A $\beta$  monomers that would otherwise cause the growth of the A $\beta$  oligomers into larger assemblies. This inhibitory mechanism is different from the iron-sequestration model, but it is qualitatively similar to a mechanism previously proposed for the inhibition of A $\beta$  self-association by another plasma and cerebrospinal fluid protein, *i.e.*, human serum albumin. These results suggest that A $\beta$  monomer competition through direct A $\beta$  oligomer binding might be a general strategy adopted by proteins in plasma and cerebrospinal fluid to prevent A $\beta$  aggregation.

### INTRODUCTION

Several plasma and CSF proteins have recently emerged as potent inhibitors of A $\beta$  aggregation (1–11). The inhibition of A $\beta$  self-association by plasma proteins is exploited in therapeutic approaches of AD that rely on the peripheral sink hypothesis (1,10,12). According to this hypothesis, agents that bind plasma A $\beta$  without crossing the blood-brain barrier function as a sink for the brain A $\beta$  and can therefore be effectively exploited to sequester the latter in peripheral tissues, minimizing the accumulation of A $\beta$  in the CNS (1,10,12). The inhibition of A $\beta$  self-association by CSF proteins is of potential therapeutic interest also because low levels of these proteins have been linked to increased odds of cognitive impairment (2,10,11,13).

Tf is one of the plasma and CSF proteins with significant A $\beta$  self-association inhibitory potency (7,11). Tf is a 78 kDa glycoprotein with a concentration of 38 and 0.17  $\mu$ M in plasma and CSF, respectively. Tf transports iron by binding Fe(III) with a 1:2 Tf:Fe(III) stoichiometry and high affinity ( $K_d \sim 10^{-21}$  M) (11). Fe(III) in its free form is known to induce the generation of oxygen radicals, which in turn stimulate the production of toxic A $\beta$  aggregates (14). In addition, the toxicity of free iron has been shown to arise also from the iron-induced stabilization of toxic, soluble intermediate oligomers of A $\beta$ , which delays the formation of allegedly less toxic well-ordered aggregates (15).

By binding Fe(III), Tf sequesters the ferric ions in a relatively nonreactive and inert state, which reduces both the oxidative damage and the stabilization of toxic A $\beta$  oligomers caused by free iron. The Fe(III) sequestration by Tf thus provides a viable mechanism to explain the A $\beta$  self-association inhibitory function observed for Tf (7,11). However, other plasma and CSF proteins have been shown to inhibit A $\beta$  aggregation through a different and more direct mechanism, which does not necessarily rely on metal sequestration (1,4,5). For instance, HSA inhibits A $\beta$  self-association by directly binding A $\beta$  oligomers and outcompeting A $\beta$  monomers that would otherwise cause the growth of the A $\beta$  oligomers into larger assemblies (1,4,5). In the case of Tf, it is currently not known whether this HSA-like direct inhibition mechanism applies or iron sequestration is the only mechanism for inhibiting A $\beta$  aggregation through Tf.

Although iron sequestration by Tf is an effective mechanism to inhibit A $\beta$  self-association, here we hypothesize that additional inhibitory mechanisms should also be taken into consideration when explaining the effect of Tf on A $\beta$  oligomerization. To test this hypothesis, we have investigated how Tf affects the self-association of the A $\beta$  (12–28) peptide, which includes the central hydrophobic core of A $\beta$  and is known to serve as a reproducible model system for soluble A $\beta$  oligomers (1,4,5,16,17). Using a combination of NMR techniques, which include STD (18) and ORR (19–22), we show that, similarly to HSA, Tf preferentially binds A $\beta$  (12–28) oligomers and competes with their interaction with monomeric A $\beta$  (12–28). These results suggest that iron sequestration (23–26) is not the only mechanism through which Tf inhibits A $\beta$  aggregation and provide a new framework to interpret the role of Tf in AD.

Submitted December 14, 2012, and accepted for publication March 26, 2013.

\*Correspondence: melacin@mcmaster.ca

**Abbreviations used:** AD, Alzheimer's disease; CNS, central nervous system; CSF, cerebrospinal fluid; HSA, human serum albumin; ICP, inductively coupled plasma; ORR, off-resonance relaxation; SL, spin-lock; STD, saturation transfer difference; STR, saturation transfer reference; Tf, transferrin; WG, watergate water-suppression NMR technique.

Editor: Klaus Gawrisch.

© 2013 by the Biophysical Society  
0006-3495/13/07/0473/8 \$2.00

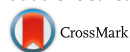

## MATERIALS AND METHODS

### Peptide sample preparation

A $\beta$  (12–28) ( $^+H_3N-V_{12}HHQKLVFFAEDVGSNK_{28}-COO^-$ ) was purchased from EZBiolab, Westfield, IN, as a lyophilized powder with a minimum purity of 96.5%. The purity and the molecular weights were checked through HPLC and mass spectrometry by EZBiolab. Each experimental trial that involved a comparison between A $\beta$  (12–28) solutions was based on the same batch of peptides to avoid any bias due to potential sample variability. For the NMR samples, a 50 mM deuterated ( $d_3$ ) sodium acetate buffer was prepared from a mixture of deuterated acetic acid ( $d_4$ ) and sodium hydroxide used to adjust the pH to 4.7. 10% D $_2$ O (Cambridge Isotopes, Andover, MA) was added to the acetate buffer for NMR locking purposes. The buffer was then subjected to a syringe-driven filtration unit with a pore size of 0.22  $\mu$ m from Millipore (Etobicoke, ON). One-dimensional (1D)  $^1H$ -WG NMR spectra of the buffer was acquired before its use for sample preparation to confirm its purity. Lyophilized A $\beta$  (12–28) was dissolved in the original vials to minimize peptide losses and left to stand on ice for 10–20 min until the peptide was fully dissolved. The uniformly dissolved sample of A $\beta$  (12–28) in 50 mM acetate- $d_3$ , 10% D $_2$ O at pH 4.7 was purified to its largely monomeric form through filtration. Ultrafree 30 kDa filter units were used to ensure minimal binding of the peptide. An Allegra 25R Centrifuge was used and run at 4000 rpm and 4°C for 5 min. Before sample filtration, potential residual glycerol from the filter units was removed from the filter through centrifugal washing with 50 mM deuterated ( $d_3$ ) sodium acetate buffer for 5–7 cycles. A $\beta$  (12–28) samples were spun repeatedly with stabilization every 5 min in ice to minimize the heating of the sample. After filtration, aggregation was reintroduced in a controlled manner through the addition of NaCl. The salt was added using aliquots from concentrated stock solutions (1 and 5 M NaCl), which were added to the filtered A $\beta$  (12–28) sample. All volumes added to the peptide samples were in the 1–15  $\mu$ L range, resulting in negligible dilution factors. The A $\beta$  (1–42) peptide samples were prepared as previously described (1,4).

### Protein sample preparation

Tf was purchased from Sigma-Aldrich, Oakville, ON, as lyophilized powder of human serum Tf with >98% purity and 20–40% saturation with ferric iron, similar to human serum. Human serum Tf is here referred as Tf. 500  $\mu$ M samples of Tf were prepared by dissolving a weighted amount of the powder in 50 mM deuterated ( $d_3$ ) sodium acetate buffer, pH 4.7 with 90:10 doubly distilled H $_2$ O:D $_2$ O. After dissolving the protein in the acetate buffer, the solution was kept on ice and/or refrigerated at +4°C. Typically, the total protein solution volume added to the peptide samples was within the range of 1–8  $\mu$ L, again resulting in negligible dilution factors.

### NMR spectroscopy

All NMR data were collected at 293 K using either a Bruker Avance 600 MHz NMR spectrometer with a 5 mm inverse triple resonance multinuclear TBI-Z probe or a Bruker Avance 700 MHz NMR with a TCI cryoProbe. All 1D  $^1H$  NMR spectra acquired were recorded with 128 scans, 32 dummy scans, and a spectral width of 8389.26 Hz sampled with 4096 complex points and a repetition delay of 1 s. The WG by gradient-tailored excitation with a binomial 3-9-19 pulse train was applied to all pulse sequences used throughout the analysis (21). The self-association of A $\beta$  (1–42) was monitored through signal losses over time in a 1D  $^1H$ -WG NMR experiment incorporating a 30 ms long SL pulse with 2.6 kHz strength before acquisition to suppress the residual protein signal. The 1D time-profiles for A $\beta$  (1–42) were acquired at 600 MHz using 128 scans and 64 dummy scans.

STD experiments were used to monitor the effect of Tf on the aggregated A $\beta$  (12–28) samples (1,5,18). To achieve on-resonance saturation, the carrier frequency of a Gaussian pulse train was applied to the valine methyl group within the hydrophobic core region of the A $\beta$  peptide at

~0.75 ppm. Off-resonance saturation for the STR experiment was obtained by saturating at 30 ppm, a region in which no specific  $^1H$  resonance occurs for the samples studied here. The saturation transfer difference spectra were obtained by subtracting on-resonance and off-resonance spectra through phase cycling (19,20). The Gaussian pulse train consisted of a sequence of 40 Gaussian-shaped pulses of 50 ms each, separated by a 1 ms interpulse delay, resulting in total saturation time of ~2 s, which was preceded by a 100 ms interscan delay. The strength of each saturating Gaussian pulse was 110.23 Hz with a 1% truncation and 1000 digitization points. A 30 ms SL pulse with strength of 2.5 kHz was applied to suppress the residual protein signal in all STD and STR experiments. For the STD experiment 128 scans and 8 dummy scans were acquired, which were reduced to 32 scans and 32 dummy scans for the more sensitive STR spectra. For each titration point two STR and four STD replica spectra were collected. All STD and STR replicas were then added to increase the S/N ratios. The errors for the STD/STR ratios were evaluated using the individual STR and STD replicas and error propagation. Before data acquisition for each protein titration point, STD experiments were performed on a filtered A $\beta$  (12–28) sample as well as on an aggregated A $\beta$  (12–28) sample without protein to confirm sample stability. All 1D spectra were processed using an exponential multiplication window function before zero filling.

The  $^1H$  off-resonance nonselective relaxation rates ( $R_{35.5^\circ,ns}$ ) experiments (ORR) were acquired at 700 MHz with an off-resonance trapezoidal SL including two adiabatic pulses of 4 ms duration and applied at the angle of 35.5° to ensure optimal NOE/ROE compensation in the spin-diffusion limit (19,20). The total SL durations were 13 and 88 ms. The strengths of the off-resonance and TOCSY SLs were 8.25 and 10 kHz, respectively. The interscan delay between the end of the acquisition and the start of the first adiabatic pulse was 2 s. The spectral widths for both dimensions were 8389.26 Hz with 256  $t_1$  and 1024  $t_2$  complex points, respectively. For each experiment, 16 scans and 128 dummy scans were employed. All two-dimensional (2D) replica sets were coadded to increase the S/N ratios and processed with Xwinnmr, Bruker) using a 90° phase-shifted squared sine-bell window function for both dimensions before zero filling. The 2D crosspeak intensities were measured with Sparky 3.111 (22) by Gaussian line fitting using the fit peak heights. The standard deviation of the differences in fit heights between two copies was used to estimate the error of the individual spectra. The error of the sum was scaled up proportionally to the square root of the total number of scans. For all residues, the  $H_{\alpha,r}-H_{N,r}$  crosspeaks were used for the ORR data analysis, with the exception of G25 and of the N-terminal V12. G25 was omitted from the analysis due to the overlap of its degenerate  $H_{\alpha}$  protons, whereas for V12, the  $H_{\alpha,12}-H_{Me,12}$  crosspeak was used to probe  $H_{\alpha}$  relaxation rates. The nonselective ORR rates in  $s^{-1}$  were computed from the experimental fit heights through the equation:

$$R_{35.5^\circ,ns} = \ln \frac{(\text{fit height at 13 ms} / \text{fit height at 88 ms})}{(0.088 \text{ s} - 0.013 \text{ s})} \quad (1)$$

The nonselective off-resonance relaxation rates calculated based on the previous equation are within error of the ORR rates calculated using five different SL times. The measured rates and the related errors were then normalized with respect to the maximum observed rate.

### Inductively coupled plasma experiments

The ICP technique was used to detect trace metals in the buffer solution used for the NMR experiments. The ICP data were acquired using a Perkin Elmer ELAN 6100 ICP-MS set at the detection wavelength of 259.94 nm for analysis of solution-based iron contamination following a pretreatment with 1% nitric acid.

## RESULTS

To probe how Tf inhibits A $\beta$  self-association, we initially acquired 1D NMR spectra of A $\beta$  (12–28) in the absence and presence of Tf (Fig. 1). The self-association of A $\beta$  (12–28) in acetate buffer has been shown to mimic in a stable and reproducible manner the early A $\beta$  soluble oligomers, which are populated only transiently by longer A $\beta$  constructs (1,4,5,16,17). The A $\beta$  (12–28) peptide in acetate buffer is subject to a steady-state exchange between monomeric and oligomeric A $\beta$  (12–28) and this dynamic self-association equilibrium is effectively monitored through NMR line-broadening (5). For instance, narrow lines are observed in the absence of salt for a filtered A $\beta$  (12–28) sample, which is primarily monomeric (Fig. 1 *a*). However, when 40 mM NaCl is added to promote self-association through electrostatic screening (27), a significant line-broadening is detected for the large majority of the A $\beta$  (12–28) signals (Fig. 1 *b*). The salt-induced increase in linewidth is caused by the exchange between the monomeric and oligomeric forms of A $\beta$  (12–28) (1,4,5).

It is notable that no detectable self-association was observed for the filtered A $\beta$  (12–28) sample under our experimental conditions and within the time frame of our experiments (Fig. 1 *a*), indicating that iron traces possibly present in our samples are not effective in promoting the aggregation of A $\beta$  (12–28). This result is also supported

by chelation experiments (vide infra) and ICP analyses, showing that the concentration of iron impurities within our samples is minimal and below 36 nM. The line-broadening observed for A $\beta$  (12–28) in Fig. 1 *b* is therefore not expected to be caused by the residual free iron, but primarily by the monomer/oligomer exchange. Nevertheless, when Tf is added to the A $\beta$  (12–28) sample in substoichiometric amounts, either before or after salt addition, a dramatic line-narrowing effect is observed (Fig. 1, *c* and *d*), which restores the A $\beta$  (12–28) line widths to values comparable to those measured for the filtered A $\beta$  (12–28) before the addition of salt (Fig. 1 *a*). No significant chemical shift changes are detected upon addition of Tf (Fig. 1).

A possible explanation for the linewidth reduction without significant chemical shift variations occurring upon Tf addition (Fig. 1) is that under our experimental conditions Tf binds selectively to the A $\beta$  (12–28) oligomers rather than to the A $\beta$  (12–28) monomer (Fig. 2). The resulting A $\beta$  (12–28) oligomer/Tf complex inhibits the exchange of A $\beta$  (12–28) polypeptide chains between the monomeric and oligomeric forms of A $\beta$  (12–28), leading to the observed line-narrowing effect of Tf (Fig. 1, *d* and *c*; Fig. S3 in the Supporting Material). The model outlined in Fig. 2 explains also why dramatic line-narrowing is obtained even with minimal substoichiometric amounts of Tf (Fig. 1, *c* and *d*). However, additional experiments are required to further corroborate the proposed model. For instance, based

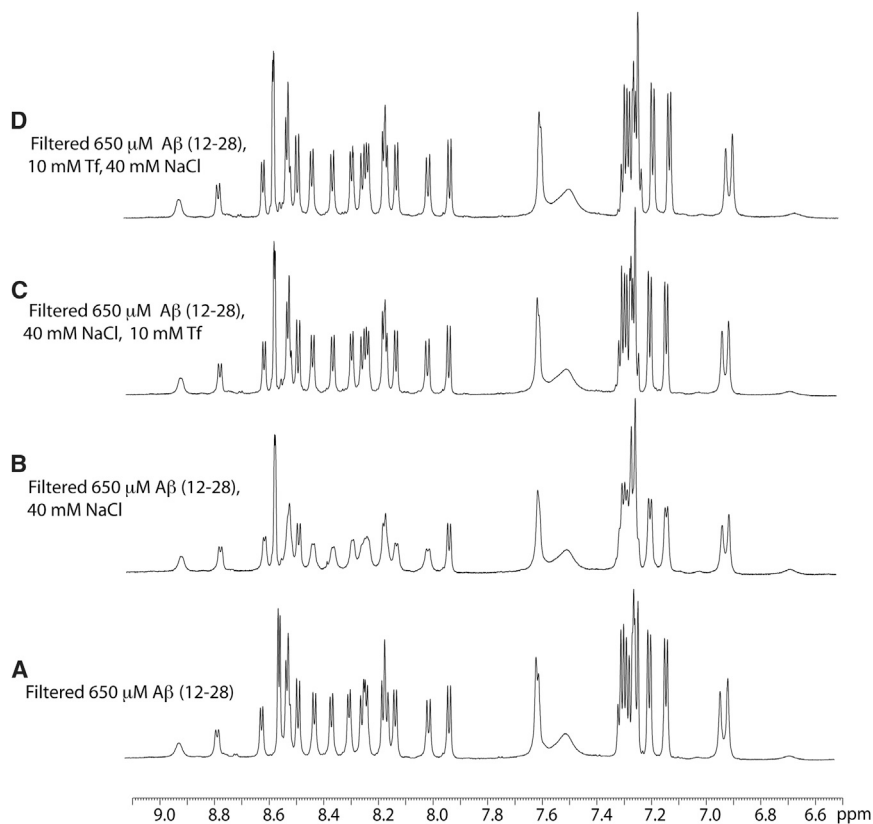

FIGURE 1 Monitoring the inhibition of A $\beta$  (12–28) self-association by Tf using 1D NMR. 1D-WG-NMR spectra of A $\beta$  (12–28) filtered with a 30 kDa C.O. filter before (A) and after (B) the addition of 40 mM NaCl. (C) Effect of the addition of 10  $\mu$ M Tf, leading to narrow lines similar to the filtered sample A. (D) Effect of the addition of Tf before NaCl, resulting in line-narrowing comparable to C. Data were collected at 293 K and 700 MHz with a Bruker TCI cryoprobe. The horizontal axis reports the  $^1\text{H}$  chemical shift in ppm.

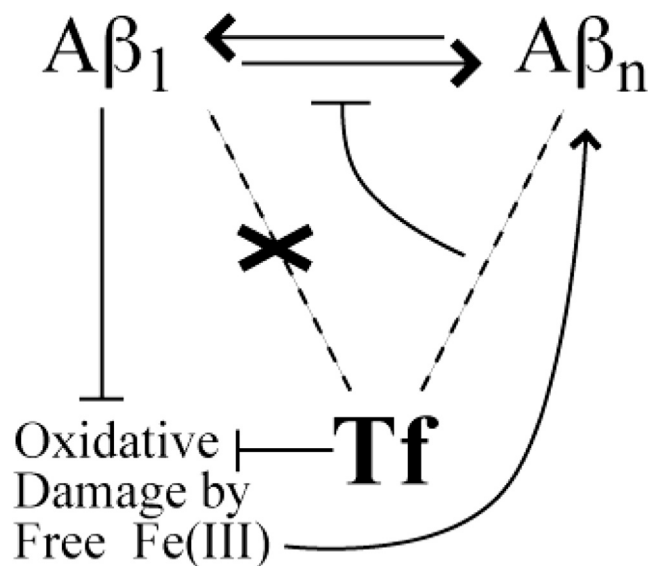

FIGURE 2 Schematic representation of the proposed direct and indirect mechanisms for the inhibition of A $\beta$  self-association by Tf. Dashed lines indicate possible noncovalent interactions between Tf and the A $\beta$  peptide. T-ended solid lines denote inhibition. Tf binds preferentially with A $\beta$  oligomers, inhibiting the addition of further A $\beta$  monomers to the preexisting A $\beta$  oligomers (*direct mechanism*). Tf also binds Fe(III) inhibiting the Fe(III) inducible oxidative damage, which would otherwise promote the formation of A $\beta$  aggregates, as indicated by the nonhorizontal arrow. This iron-mediated inhibitory mechanism is denoted here as the indirect mechanism or the iron-sequestration mechanism. Monomeric A $\beta$  inhibits iron inducible oxidative damage (14).

on the data of Fig. 1 it is not possible to rule out the possibility that the absence of A $\beta$  (12–28) monomer/Tf interactions is simply due to the saturation of Tf by A $\beta$  (12–28) oligomers as opposed to the lack of any significant affinity of Tf for monomeric A $\beta$  (12–28). To further probe this possibility, we designed a negative control experiment in which Tf was added to a sample with filtered and diluted A $\beta$  (12–28) in the absence of salt to ensure that A $\beta$  (12–28) is primarily monomeric without potentially Tf-saturating A $\beta$  (12–28) oligomers (Fig. S1). No significant

changes were observed for A $\beta$  (12–28) in either line widths or chemical shifts upon the addition of Tf (Fig. S1), indicating that indeed under our experimental conditions Tf does not significantly bind monomeric A $\beta$  (12–28) and confirming our initial hypothesis (Fig. 2).

The selectivity of Tf for A $\beta$  (12–28) oligomeric species was further confirmed by a positive control experiment in which the fraction of NMR-undetectable A $\beta$  (12–28) oligomers is effectively increased by increasing the NaCl concentration from 40 to 60 mM (Fig. S2 b). As expected, in the presence of 60 mM NaCl further line-broadening is observed (Fig. S2 b) relative to the spectra acquired with 40 mM NaCl (Fig. 1 b), confirming a higher population of A $\beta$  (12–28) oligomers. Based on the model of Fig. 2, we would then expect that, upon addition of Tf, line-narrowing should be observed due to the inhibition of monomer/oligomer exchange, but without restoring the intensity of the NMR signal to the values measured before addition of salt, due to the sequestration of a large fraction of monomer into NMR-undetectable oligomers. Our data fully support this prediction (Fig. S2 c). When Tf is added to the A $\beta$  (12–28) sample with 60 mM NaCl, line-narrowing is observed (Fig. S2 c), similar to Fig. 1. However, unlike Fig. 1, Tf is unable to restore the intensity of the NMR signal to the levels observed in the absence of salt (Fig. S2 a), despite the line-narrowing effect of Tf (Fig. S2 c). These observations further confirm the model of Fig. 2.

A specific implication of the proposed model (Fig. 2) is that Tf effectively screens the A $\beta$  (12–28) oligomers from the monomeric form of A $\beta$  (12–28). Based on the model of Fig. 2, we therefore expect that the NMR line-narrowing effect of Tf should be comparable to that obtained through physical removal of the A $\beta$  (12–28) oligomers, for instance through filtration in the absence of salt. A stringent test of this prediction is provided by NMR experiments that quantitatively measure the linewidth change. One of these NMR methods is the 2D ORR experiment with a tilt angle of 35.5° (19,20). Fig. 3 a indicates that the residue-specific ORR rates of the filtered sample without NaCl and of the sample

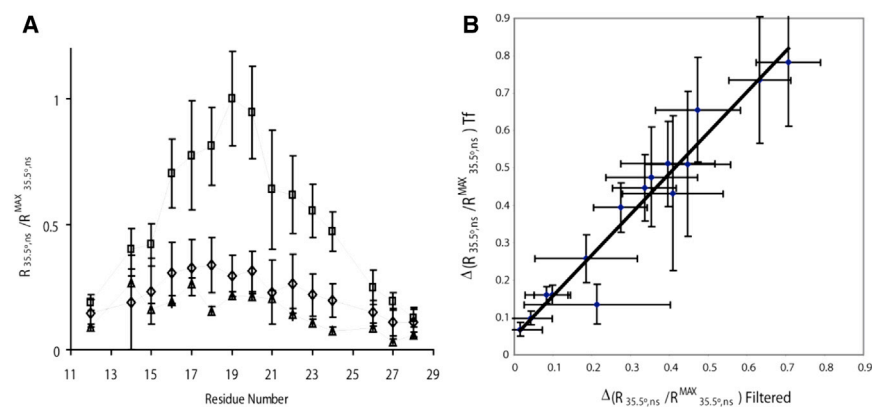

FIGURE 3 Tf addition and filtration have comparable effects on the ORR rates of A $\beta$  (12–28). (A) Residue-specific normalized ORR rates for filtered 650  $\mu$ M A $\beta$  (12–28) ( $\blacktriangle$ ), 650  $\mu$ M A $\beta$  (12–28) with 40 mM NaCl ( $\square$ ) and 650  $\mu$ M A $\beta$  with both 40 mM NaCl and 10  $\mu$ M Tf ( $\diamond$ ). (B) Correlation between the changes in normalized ORR rates caused by Tf (*vertical axis*) and those caused by filtration (*horizontal axis*). The 2D ORR data were recorded at 293 K and at 700 MHz using a Bruker TCI cryoprobe.

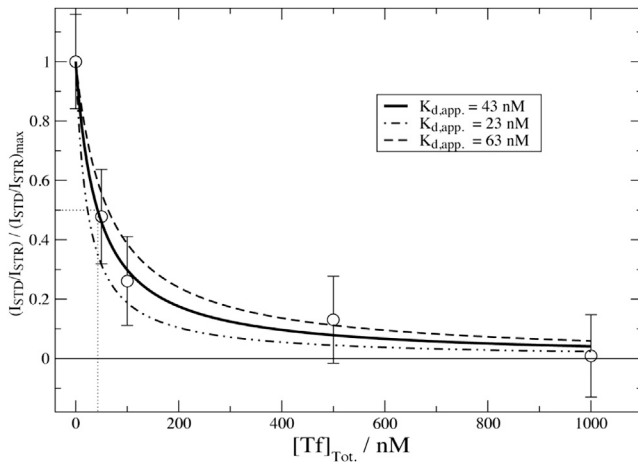

FIGURE 4 1D STD monitored isotherm for the A $\beta$  (12–28) self-association inhibition by Tf. Tf was titrated into a solution of salt-aggregated 650  $\mu$ M A $\beta$  (12–28) and 1D STD and STR spectra were acquired at 293 K and at 600 MHz using a Bruker TBI-Z probe. Experimental data points are reported as circles, whereas the solid line was obtained through nonlinear fitting of the equation  $f + (1-f) * K_{d,app} / (K_{d,app} + [Tf])$ , where  $f$  is the fraction of A $\beta$  (12–28) oligomers that are not Tf-binding competent,  $[Tf]$  is the concentration of free Tf and  $K_{d,app}$  is an apparent average dissociation constant for the complexes between Tf and the other A $\beta$  (12–28) oligomers (1). The dashed and dot-dashed lines were obtained using the same equation but by varying the  $K_{d,app}$  value obtained through nonlinear curve fitting (i.e., 43 nM, assuming that the product of the total concentration of Tf-binding competent A $\beta$  oligomers and of the ratio of the number of Tf molecules bound per A $\beta$  oligomer versus the number of A $\beta$  oligomers bound per Tf molecule is  $\leq 5$  nM. If this product is  $>5$  nM, the  $K_{d,app}$  values reported in the figure become just an upper limit to the best fit  $K_{d,app}$  values). We also assumed that all Tf molecules bind to equivalent and independent binding sites (Scatchard-like model) (1). The latter assumption reflects the simplest model that fits the experimental data. The dotted line defines the IC<sub>50</sub> for the inhibition of A $\beta$  (12–28) self-association inhibition by Tf.

with both 40 mM NaCl and Tf are systematically reduced relative to those of the sample with 40 mM NaCl but without Tf. This result was expected based on the linewidth changes

reported in Fig. 1. However, the quantitative ORR analysis also shows that the changes in relaxation caused by Tf addition are comparable and correlated with those caused by the physical elimination of the A $\beta$  (12–28) oligomers through filtration (Fig. 3 *b*), confirming the oligomer screening function of Tf as predicted by the model shown in Fig. 2.

Another NMR method to quantitatively monitor the A $\beta$  (12–28) oligomer screening effect exerted by Tf is the STD NMR experiment (5,18). Fig. 4 reports the relative 1D STD changes observed for A $\beta$  (12–28) as a function of the Tf concentration, showing a clear dose-response pattern with distinct binding and saturation regions. The plateau observed in the saturation region indicates that the interaction between the A $\beta$  (12–28) oligomers and Tf is specific, whereas the binding region points to an IC<sub>50</sub>  $\leq 0.1$   $\mu$ M for the inhibition of A $\beta$  (12–28) self-association by Tf under our experimental conditions (Fig. 4).

To further test the hypothesis that the inhibition of A $\beta$  (12–28) self-association by Tf observed under our experimental conditions is not due to iron sequestration, we acquired STD spectra in the presence of a metal chelator, i.e., EDTA (Fig. 5). Fig. 5 shows that EDTA does not affect the STD magnitude of the salt aggregated A $\beta$  (12–28) sample, indicating that under our experimental conditions iron sequestration is not a viable mechanism for inhibiting A $\beta$  (12–28) self-association. However, when Tf is added, either before or after the addition of EDTA, the STD magnitude is decreased to values comparable to those observed for the filtered A $\beta$  (12–28) sample in the absence of salt, which is mainly monomeric (Fig. 5). Overall, the results of Fig. 5 confirm that under our experimental conditions the mechanism for the inhibition of A $\beta$  (12–28) self-association by Tf does not rely on iron sequestration (Fig. 2).

The model for the A $\beta$  self-association inhibitory function of Tf proposed in Fig. 2 based on A $\beta$  (12–28), also explains the effect of Tf on the longer A $\beta$  (1–42) peptide (Fig. 6).

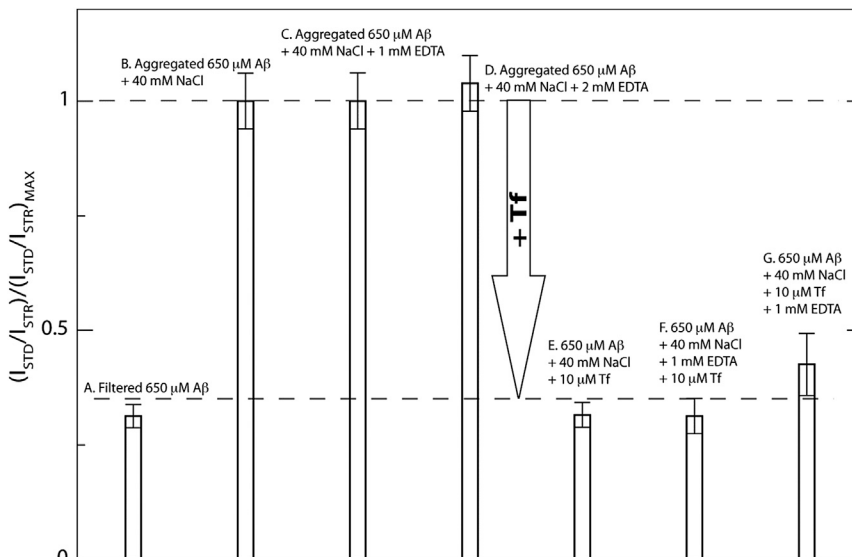

FIGURE 5 1D STD monitored chelation experiments show that Tf can inhibit A $\beta$  (12–28) self-association even without iron sequestration. Normalized STD/STR ratios measured under multiple experimental conditions, as reported in the figure. Compounds were added in the order listed. All data were collected at 293 K and at 700 MHz using a Bruker TCI cryoprobe.

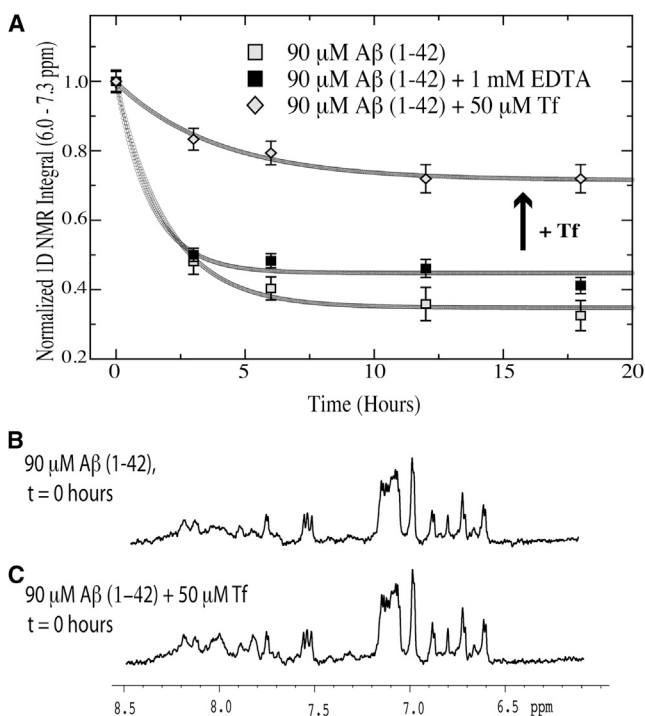

**FIGURE 6** Effect of chelation and Tf addition on the aggregation profile of A $\beta$  (1–42) as monitored by 1D NMR signal losses over time. (A) 1D NMR integral versus time for A $\beta$  (1–42), A $\beta$  (1–42) + 1 mM EDTA, and A $\beta$  (1–42) + 50  $\mu$ M Tf. Symbols for the actual experimental data are reported in the figure legend. The experimental data were fitted using the offset decaying exponential:  $a \times e^{-bt} + c$ , where  $t$  is in hours and the  $a$ – $c$  parameters were obtained through nonlinear curve-fitting. The fitted curves are shown as a sequence of open circles. After ~20 h most of the 1D NMR signal of A $\beta$  (1–42) is lost due to the formation of high-MW NMR-undetectable aggregates. A similar pattern is observed in the presence of the EDTA chelator, however Tf considerably reduces the degree of signal loss. (B and C) 1D NMR spectra of A $\beta$  (1–42) at the first sampled time point in the absence and presence of Tf. Tf does not cause detectable changes in the 1D NMR spectra, consistent with the absence of significant binding between Tf and monomeric A $\beta$  (1–42). The horizontal axis reports the  $^1\text{H}$  chemical shift in ppm.

Due to the transient nature of the STD-detectable A $\beta$  (1–42) oligomers, the A $\beta$  (1–42) self-association was monitored through losses in the 1D NMR signal of A $\beta$  (1–42), which results from the formation of high molecular weight (MW) NMR-undetectable aggregates. Fig. 6 *a* shows the time profile for the 1D NMR signal of A $\beta$  (1–42). In the absence of Tf, >60% of the original NMR signal is lost after 24 h (Fig. 6 *a*). Upon addition of 1 mM of the EDTA chelator only minimal and almost marginal changes in the A $\beta$  (1–42) time profile are detected (Fig. 6 *a*), indicating that free iron sequestration is not an effective mechanism to inhibit A $\beta$  (1–42) aggregation under our experimental conditions, likely due to the low iron content of our solutions. However, upon addition of substoichiometric amounts of Tf a significant enhancement of the 1D NMR signal is observed (Fig. 6 *a*), confirming that Tf is able to inhibit A $\beta$  (1–42) self-association through a mechanism that does

not necessarily rely on iron sequestration. This mechanism does not involve binding of Tf to A $\beta$  (1–42) monomers, as no change in chemical shift for A $\beta$  (1–42) was observed upon the Tf addition (Fig. 6, *b* and *c*). Therefore, we conclude that the A $\beta$  (1–42) data presented in Fig. 6 fully support the model outlined in Fig. 2 and originally based on the A $\beta$  (12–28) system.

## DISCUSSION

Our data on the A $\beta$  (12–28) peptide consistently indicate that Tf is able to inhibit A $\beta$  self-association even without iron sequestration. This inhibitory effect is supported by multiple independent experiments, i.e., Tf-dependent changes in linewidth (Fig. 1 and Fig. S2), in ORR rates (Fig. 3), in STD/STR ratios (Fig. 4 and Fig. 5). Overall, our data are fully consistent with a model in which Tf selectively binds A $\beta$  oligomers rather than monomers (Fig. 2). Upon binding to Tf, the A $\beta$  oligomers are screened from the A $\beta$  monomers hindering the growth of the A $\beta$  oligomers into larger assemblies (Fig. 2). Under our experimental conditions, the affinity of Tf for the A $\beta$  (12–28) oligomers appears to be in the sub- $\mu$ M range, with IC<sub>50</sub> values not greater than the plasma concentration of Tf (~38  $\mu$ M) (7). Previously, an IC<sub>50</sub> value of 30  $\mu$ M was reported for the inhibition of biotin-labeled A $\beta$  (1–40) incorporation into immobilized A $\beta$  (1–42) polymers by Tf (7). This IC<sub>50</sub> value is in between the plasma and CSF concentrations of Tf and is significantly higher than the IC<sub>50</sub> reported here (Fig. 4), but it is possible that variations in IC<sub>50</sub> values are due to differences in experimental conditions and/or A $\beta$  peptide used. Specifically, the data of Fig. 1 and Figs. 3–5 were acquired on the A $\beta$  (12–28) peptide and different A $\beta$  constructs may behave differently. However, the 1D intensity versus time profiles measured for A $\beta$  (1–42) (Fig. 6) suggest that the model proposed for A $\beta$  (12–28) may apply, at least at a qualitative level, also to longer A $\beta$  peptides.

The model of A $\beta$  self-association inhibition by Tf emerging from this study (Fig. 2) is qualitatively similar to the mechanism previously proposed for the inhibition of A $\beta$  aggregation by another plasma protein, i.e., HSA (1,4,5). Furthermore, in the case of HSA a marked A $\beta$  oligomer versus monomer selectivity was observed and, similar to Tf, the A $\beta$  oligomer – HSA complexes compete with the addition of A $\beta$  monomers to preexisting A $\beta$  oligomers (1,4,5). It is therefore possible that the A $\beta$  oligomer-binding model proposed in Fig. 2 represents a general A $\beta$  self-association inhibitory strategy shared by multiple plasma proteins. In addition, other A $\beta$  self-association inhibitory agents have been shown to act through a similar mechanism. For instance, inorganic nanoparticles such as quantum dots bind to A $\beta$  oligomers or fibers and interfere with the conversion of monomers into fibers (28).

The A $\beta$  oligomer-binding model is however markedly different from a previously proposed mechanism for the protective action of Tf against A $\beta$  fibrillization (Fig. 2) (11). According to the previous model, Tf inhibits A $\beta$  aggregation by sequestering free iron, which would otherwise induce the production of toxic A $\beta$  aggregates either by promoting the formation of oxygen-free radicals and/or by delaying the formation of ordered and less toxic A $\beta$  fibrils (Fig. 2) (11,15,23–26). The iron-sequestration mechanism still remains a viable strategy for the inhibition of A $\beta$  fibrillization by Tf because Fe, together with Cu and Zn, is likely linked to pathological events in AD (29), here we show that other more direct mechanisms should be considered as well (Fig. 2). Furthermore, monomeric A $\beta$  is known to inhibit neuronal cell death caused by Fe(II) and Fe(III) and therefore the absence of detectable interactions between Tf and A $\beta$  monomers suggests that even in the presence of Tf the monomeric form of A $\beta$  can still serve as an antioxidant against metal-induced oxidative damage (Fig. 2) (14). It is also possible that Tf enhances the concentration of monomeric A $\beta$  by interfering with its binding to A $\beta$  oligomers, thus indirectly potentiating the antioxidant effect of monomeric A $\beta$ . Overall, we conclude that the mechanism proposed here for the inhibition of A $\beta$  self-association by Tf, i.e., formation of A $\beta$  oligomer:Tf complexes and consequent screening of A $\beta$  oligomers from A $\beta$  monomers (Fig. 2), is distinct from the previously elucidated iron-sequestration inhibitory models (Fig. 2) and should be taken into consideration when rationalizing the role of Tf in A $\beta$  fibrillization.

## SUPPORTING MATERIAL

Three figures and their legends are available at [http://www.biophysj.org/biophysj/supplemental/S0006-3495\(13\)00510-9](http://www.biophysj.org/biophysj/supplemental/S0006-3495(13)00510-9).

The authors thank Tyler McNicholl, Elle Dunitz, Rajeevan Selvaratnam, Mostafa Elgamal, Mohammed Mazhab Jafari, Naeimeh Jafari, Soumita Das, Dr. Rahul Das, and Dr. Somenath Chowdhury for helpful discussions, along with the late Dr. Don Hughes for his help and guidance.

This work was possible through the financial support of the National Science and Engineering Research Council (NSERC).

## REFERENCES

- Milojevic, J., and G. Melacini. 2011. Stoichiometry and affinity of the human serum albumin-Alzheimer's A $\beta$  peptide interactions. *Biophys. J.* 100:183–192.
- Llewellyn, D. J., K. M. Langa, ..., I. A. Lang. 2010. Serum albumin concentration and cognitive impairment. *Curr. Alzheimer Res.* 7:91–96.
- Boada, M., P. Ortiz, ..., A. Páez. 2009. Amyloid-targeted therapeutics in Alzheimer's disease: use of human albumin in plasma exchange as a novel approach for Abeta mobilization. *Drug News Perspect.* 22:325–339.
- Milojevic, J., A. Raditsis, and G. Melacini. 2009. Human serum albumin inhibits Abeta fibrillization through a "monomer-competitor" mechanism. *Biophys. J.* 97:2585–2594.
- Milojevic, J., V. Esposito, ..., G. Melacini. 2007. Understanding the molecular basis for the inhibition of the Alzheimer's Abeta-peptide oligomerization by human serum albumin using saturation transfer difference and off-resonance relaxation NMR spectroscopy. *J. Am. Chem. Soc.* 129:4282–4290.
- Biere, A. L., B. L. Ostaszewski, ..., D. J. Selkoe. 1996. Amyloid beta-peptide is transported on lipoproteins and albumin in human plasma. *J. Biol. Chem.* 271:32916–32922.
- Bohrmann, B., L. Tjernberg, ..., C. Nordstedt. 1999. Endogenous proteins controlling amyloid beta-peptide polymerization. Possible implications for beta-amyloid formation in the central nervous system and in peripheral tissues. *J. Biol. Chem.* 274:15990–15995.
- Ma, B. Y., and R. Nussinov. 2012. Selective molecular recognition in amyloid growth and transmission and cross-species barriers. *J. Mol. Biol.* 421:172–184.
- Reyes Barcelo, A. A., F. J. Gonzalez-Velasquez, and M. A. Moss. 2009. Soluble aggregates of the amyloid-beta peptide are trapped by serum albumin to enhance amyloid-beta activation of endothelial cells. *J. Biol. Eng.* 3:1–8.
- Costa, M., A. M. Ortiz, and J. I. Jorquera. 2012. Therapeutic albumin binding to remove amyloid-beta. *J. Alzh. Disease.* 29:159–170.
- Giunta, S., R. Galeazzi, ..., L. Galeazzi. 2004. Transferrin neutralization of amyloid beta 25–35 cytotoxicity. *Clin. Chim. Acta.* 350:129–136.
- Deane, R., Z. H. Wu, and B. V. Zlokovic. 2004. RAGE (yin) versus LRP (yang) balance regulates alzheimer amyloid beta-peptide clearance through transport across the blood-brain barrier. *Stroke.* 35(11, Suppl 1):2628–2631.
- Loeffler, D. A., J. R. Connor, ..., P. A. LeWitt. 1995. Transferrin and iron in normal, Alzheimer's disease, and Parkinson's disease brain regions. *J. Neurochem.* 65:710–724.
- Zou, K., J. S. Gong, ..., M. Michikawa. 2002. A novel function of monomeric amyloid beta-protein serving as an antioxidant molecule against metal-induced oxidative damage. *J. Neurosci.* 22:4833–4841.
- Liu, B., A. Moloney, ..., D. C. Crowther. 2011. Iron promotes the toxicity of amyloid beta peptide by impeding its ordered aggregation. *J. Biol. Chem.* 286:4248–4256.
- Jarvet, J., P. Damberg, ..., A. Graslund. 2000. Reversible random coil to beta-sheet transition and the early stage of aggregation of the A beta(12–28) fragment from the alzheimer peptide. *J. Am. Chem. Soc.* 122:4261–4268.
- Mansfield, S. L., D. A. Jayawickrama, ..., C. K. Larive. 1998. Measurement of peptide aggregation with pulsed-field gradient nuclear magnetic resonance spectroscopy. *Biochim. Biophys. Acta.* 1382: 257–265.
- Huang, H., J. Milojevic, and G. Melacini. 2008. Analysis and optimization of saturation transfer difference NMR experiments designed to map early self-association events in amyloidogenic peptides. *J. Phys. Chem. B.* 112:5795–5802.
- Esposito, V., R. Das, and G. Melacini. 2005. Mapping polypeptide self-recognition through <sup>1</sup>H off-resonance relaxation. *J. Am. Chem. Soc.* 127:9358–9359.
- Milojevic, J., V. Esposito, ..., G. Melacini. 2006. Analysis and parametric optimization of <sup>1</sup>H off-resonance relaxation NMR experiments designed to map polypeptide self-recognition and other noncovalent interactions. *J. Phys. Chem. B.* 110:20664–20670.
- Piotto, M., V. Saudek, and V. Sklenár. 1992. Gradient-tailored excitation for single-quantum NMR spectroscopy of aqueous solutions. *J. Biomol. NMR.* 2:661–665.
- Sparky 3.111 Goddard, T. D. and Kneller, D. G., SPARKY 3, University of California, San Francisco.
- Casadesus, G., M. A. Smith, ..., G. Perry. 2004. Alzheimer disease: evidence for a central pathogenic role of iron-mediated reactive oxygen species. *J. Alzheimers Dis.* 6:165–169.

24. Monji, A., H. Utsumi, ..., N. Tashiro. 2002. Amyloid-beta-protein (A beta) (25–35)-associated free radical generation is strongly influenced by the aggregational state of the peptides. *Life Sci.* 70:833–841.
25. Monji, A., H. Utsumi, ..., N. Tashiro. 2001. The relationship between the aggregational state of the amyloid-beta peptides and free radical generation by the peptides. *J. Neurochem.* 77:1425–1432.
26. Olanow, C. W. 1993. A radical hypothesis for neurodegeneration. *Trends Neurosci.* 16:439–444.
27. Vivekanandan, S., J. R. Brender, ..., A. Ramamoorthy. 2011. A partially folded structure of amyloid-beta(1–40) in an aqueous environment. *Biochem. Biophys. Res. Commun.* 411:312–316.
28. Yoo, S. I., M. Yang, ..., N. A. Kotov. 2011. Inhibition of amyloid peptide fibrillation by inorganic nanoparticles: functional similarities with proteins. *Angew. Chem. Int. Ed. Engl.* 50:5110–5115.
29. DeToma, A. S., S. Salamekh, ..., M. H. Lim. 2012. Misfolded proteins in Alzheimer's disease and type II diabetes. *Chem. Soc. Rev.* 41:608–621.



Supplementary Material for

Understanding the Molecular Basis for the  
Inhibition of the Alzheimer's A $\beta$ -Peptide  
Oligomerization by Transferrin using Saturation  
Transfer Difference and Off-Resonance  
Relaxation NMR Spectroscopy

*Annie V. Raditsis<sup>1</sup>, Julijana Milojevic<sup>1</sup> and Giuseppe Melacini<sup>1,2,\*</sup>*

<sup>1</sup>Department of Chemistry and Chemical Biology and <sup>2</sup>Department of Biochemistry and Biomedical Sciences, McMaster University, 1280 Main Street West, Hamilton, Ontario, L8S 4M1, Canada.

\*Correspondence to: [melacin@mcmaster.ca](mailto:melacin@mcmaster.ca)

## Supplementary Figure Captions

**Figure S1:** *Tf does not significantly bind monomeric A $\beta$ (12-28) under our experimental conditions.* 1D WG-NMR spectra of filtered 125  $\mu$ M A $\beta$  (12-28) before (A) and after (B) the addition of 65  $\mu$ M Tf. A spin-lock is included in the pulse sequence prior to acquisition in order to suppress most of the Tf signal. The asterisks label the peaks of Tf that were not suppressed by the spin-lock. No significant differences are observed between the chemical shifts, intensities or line-widths of the spectra in panels A and B, indicating that under our experimental conditions Tf does not significantly bind monomeric A $\beta$  (12-28). These data were acquired at 293 K and at 700-MHz using a Bruker TCI-Z cryoprobe. The horizontal axis reports the  $^1$ H chemical shift in ppm.

**Figure S2:** *Tf binds oligomeric A $\beta$ (12-28) under our experimental conditions.* 1D WG-NMR spectra of filtered 650  $\mu$ M A $\beta$  (12-28) before (A) and after (B) addition of 60 mM NaCl, which promotes A $\beta$  (12-28) self-association through electrostatic screening. (C) As panel (B) but after the addition of 10  $\mu$ M Tf. The lower intensity of signals in panel (C) relative to those in panel (A) points to Tf binding A $\beta$  (12-28) oligomers. These spectra were acquired at 293 K and at 700 MHz using a Bruker TCI cryoprobe. The horizontal axis reports the  $^1$ H chemical shift in ppm.

**Figure S3:** *Full size expansion of the spectra show in Fig. 1a-c.* The horizontal axis reports the  $^1$ H chemical shift in ppm.

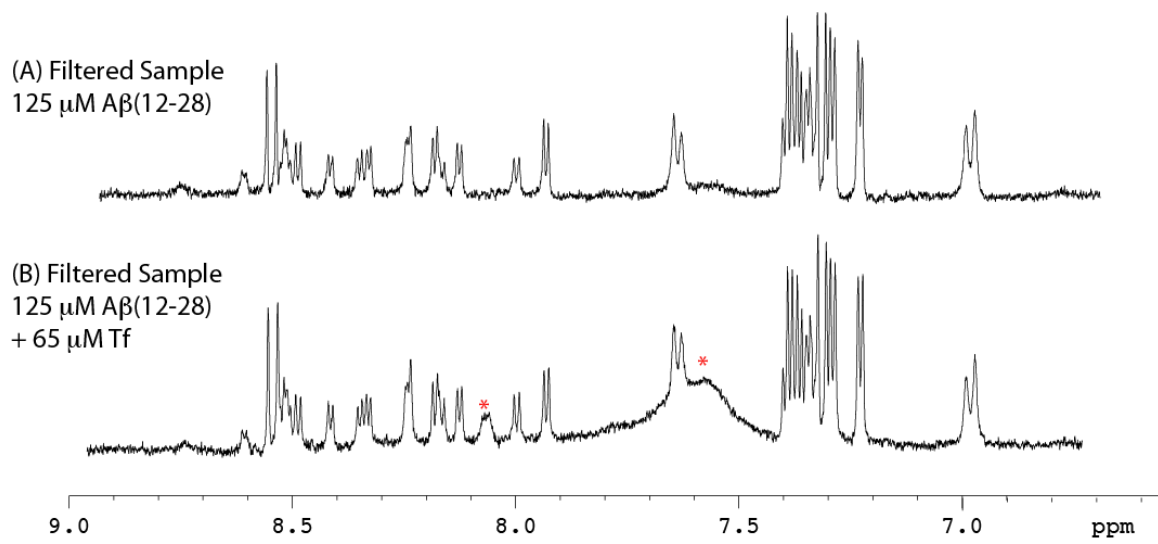

**Figure S1**

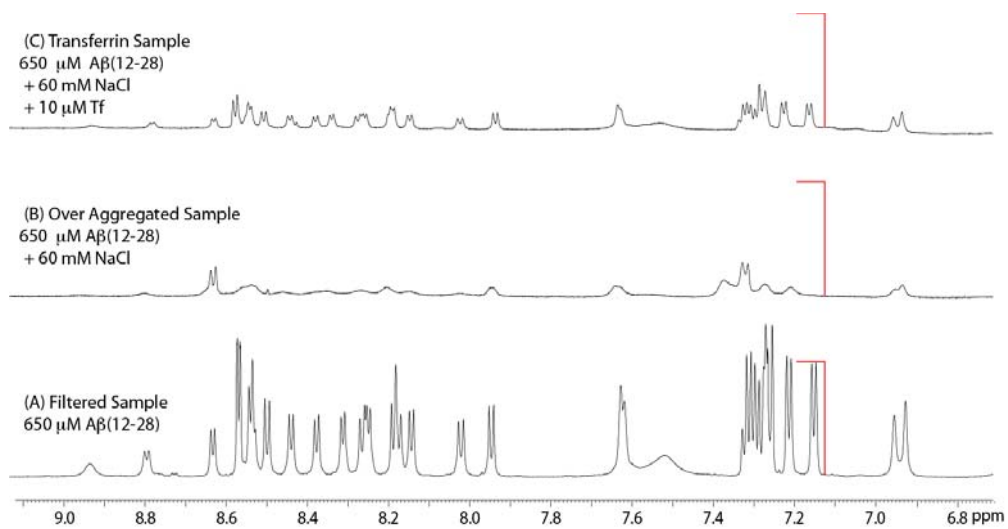

**Figure S2**

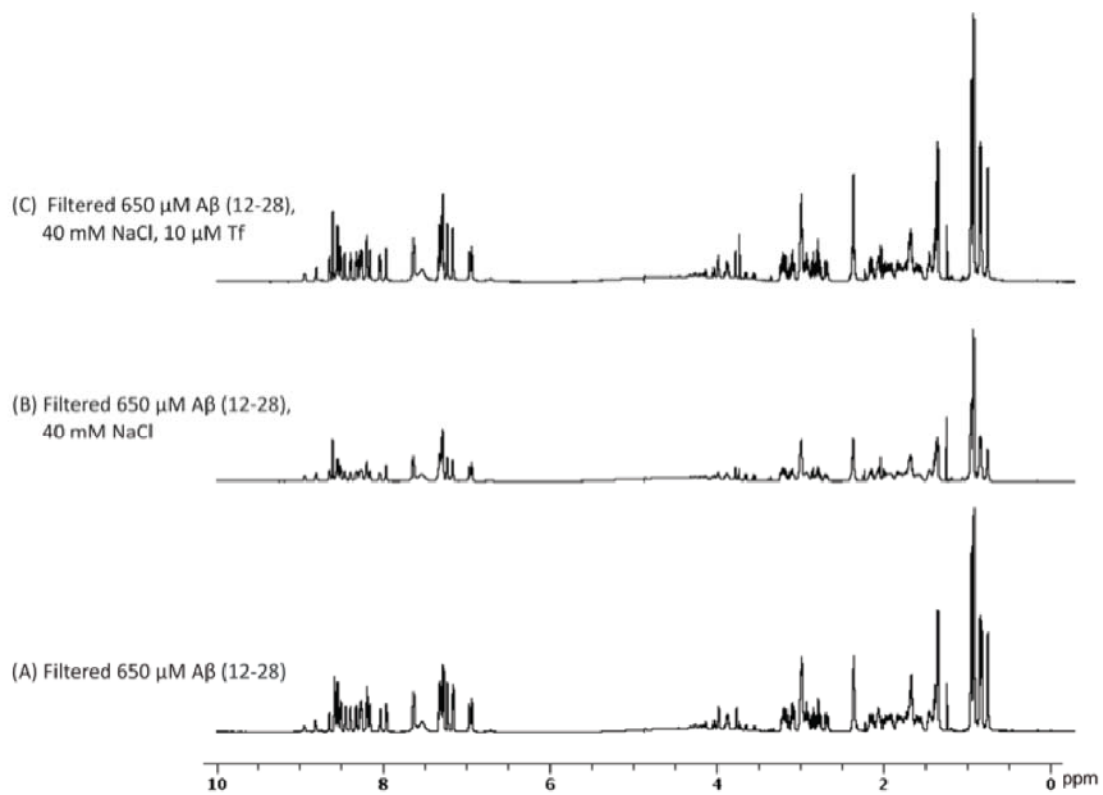

**Figure S3**
